# Supplementary material for: The utility of ctDNA in detecting minimal residual disease following curative surgery in colorectal cancer: a systematic review and meta-analysis
Source: Br J Cancer. 2022 Nov 8;128(2):297–309. doi: 10.1038/s41416-022-02017-9 (PMC9902552; doi:10.1038/s41416-022-02017-9)
Supplement: Supplementary file 1 — Supplementary Material Faulkner et al. [file 41416_2022_2017_MOESM1_ESM.pdf]

## **Supplementary Material**

### **Supplementary Figures**

**Supplementary Figure 1.** Multivariate Analysis

**Supplementary Figure 2.** Overall survival

### **Supplementary Tables**

**Supplementary Table 1.** Quality Assessment domains.

**Supplementary Table 2.** Key excluded studies.

**Supplementary Table 3.** Overall Survival.

**Supplementary Table 4.** Quality Assessment.

### **Supplementary Material**

Search strategies

Data Extraction form

Quality Assessment form

### **References**

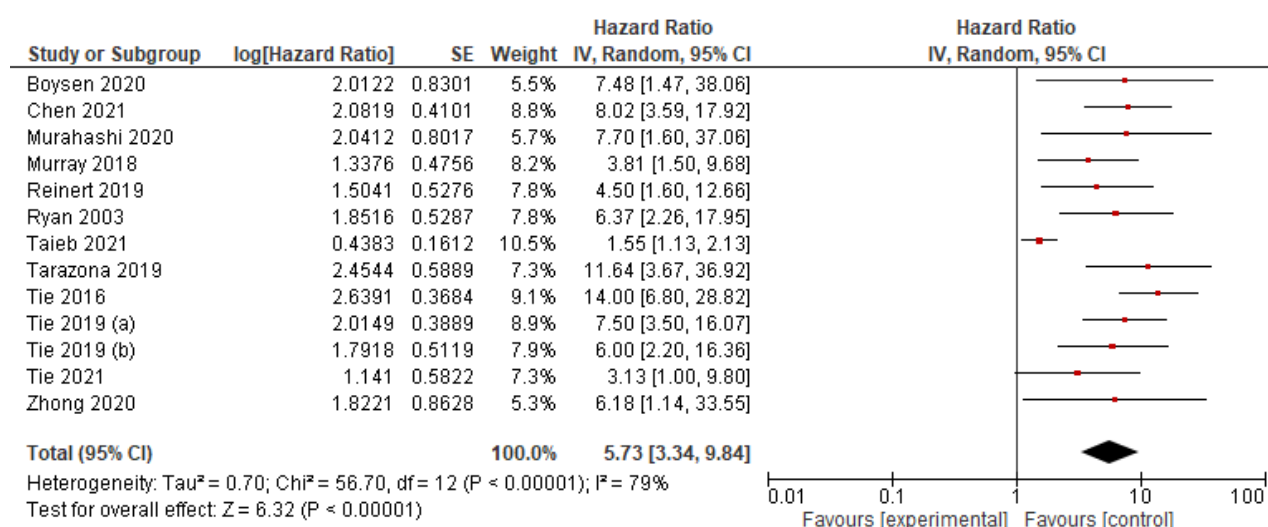

**Supplementary Figure 1.** Forest plot showing meta-analysis for PFS according to post-operative ctDNA in patients undergoing curative surgical resection for colorectal cancer where multivariate analysis was performed. Data displayed as HR with 95% confidence intervals on a logarithmic scale. HR- hazard ratio PFS- progression-free survival SE-standard error.

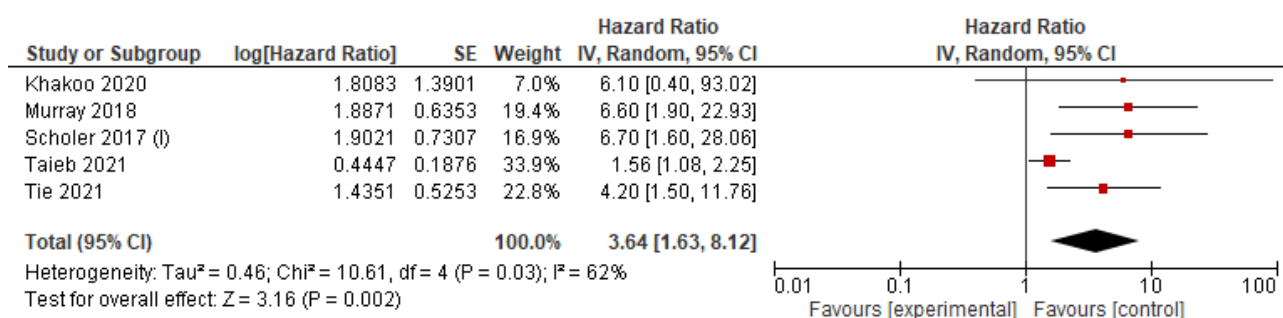

**Supplementary Figure 2.** Forest plot showing meta-analysis for OS according to post-operative ctDNA in patients undergoing curative surgical resection for colorectal cancer. Data displayed as HR with 95% confidence intervals on a logarithmic scale. HR- hazard ratio OS-overall survival SE- standard error.

|                                                                                                                                                                          |                                             |
|--------------------------------------------------------------------------------------------------------------------------------------------------------------------------|---------------------------------------------|
| <b>Pre-intervention</b>                                                                                                                                                  |                                             |
| Bias due to confounding                                                                                                                                                  | Q2, Q4, Q5, Q10                             |
| Bias in the selection of participants into the study                                                                                                                     | Q2, timeline (collected in data extraction) |
| <b>At intervention</b>                                                                                                                                                   |                                             |
| Bias in the classification of interventions                                                                                                                              | Q6, Q7, Q8                                  |
| <b>Post-intervention</b>                                                                                                                                                 |                                             |
| Bias due to deviation from intended interventions                                                                                                                        | Q5                                          |
| Bias due to missing data                                                                                                                                                 | Q9                                          |
| Bias in the measurement outcomes                                                                                                                                         | Q12                                         |
| Bias in the selection of the reported results                                                                                                                            | Q13                                         |
| <b>Supplementary table 1. Quality Assessment domains.</b> Table to show the mapping of the Quality Assessment proforma used to the domains of bias of the ROBINS-I tool. |                                             |

| Author      | Year | Reason for exclusion                                                                                                                                           | Reference |
|-------------|------|----------------------------------------------------------------------------------------------------------------------------------------------------------------|-----------|
| Appelt      | 2020 | Outcomes reported according to pre-operative ctDNA and ctDNA was not measured after surgery                                                                    | (1)       |
| Baumgartner | 2018 | Outcomes reported according to pre-operative ctDNA and ctDNA was not measured after surgery                                                                    | (2)       |
| Bazan       | 2006 | Outcomes reported according to pre-operative ctDNA and ctDNA was not measured after surgery                                                                    | (3)       |
| Bidard      | 2019 | Outcomes reported according to pre-operative ctDNA and ctDNA was not measured after surgery                                                                    | (3)       |
| Boysen      | 2017 | Outcomes reported according to pre-operative ctDNA and ctDNA was not measured after surgery                                                                    | (4)       |
| Cassinotti  | 2013 | Does not report the proportion of patients with disease relapse, do not report the proportion of patients classified as ctDNA positive after surgery           | (5)       |
| Frattini    | 2006 | Outcomes not presented in terms of ctDNA after surgery                                                                                                         | (6)       |
| Frattini    | 2008 | Does not give long-term outcomes according to post surgery ctDNA, authors contacted no reply                                                                   | (7)       |
| Garcia-Olmo | 2012 | Does not give PFS according to post surgery ctDNA                                                                                                              | (8)       |
| Hao         | 2014 | Unable to differentiate surgical patients from non-surgical patients, disease relapse not reported                                                             | (9)       |
| Hendricks   | 2018 | Measures CTC not ctDNA                                                                                                                                         | (10)      |
| Herbst      | 2009 | Outcomes reported according to pre-operative ctDNA and ctDNA was not measured after surgery                                                                    | (11)      |
| Hsieh       | 2005 | Outcomes reported according to pre-operative ctDNA and ctDNA was not measured after surgery                                                                    | (12)      |
| Iwai        | 2019 | Measures cfDNA not ctDNA                                                                                                                                       | (13)      |
| Li          | 2020 | Only a single patient in their sample underwent surgery for CRC                                                                                                | (14)      |
| Lin         | 2014 | Outcomes reported according to pre-operative ctDNA and ctDNA was not measured after surgery                                                                    | (15)      |
| Narayan     | 2019 | Outcomes reported according to pre-operative ctDNA and ctDNA was not measured after surgery                                                                    | (16)      |
| Pazdirek    | 2020 | Outcomes reported according to pre-operative ctDNA and ctDNA was not measured after surgery                                                                    | (17)      |
| Polivka     | 2020 | Outcomes not presented in terms of ctDNA after surgery                                                                                                         | (18)      |
| Schou       | 2018 | Measures cfDNA not ctDNA                                                                                                                                       | (19)      |
| Symonds     | 2018 | Patients not followed up after surgery                                                                                                                         | (20)      |
| Vidal       | 2021 | Outcomes reported according to pre-operative ctDNA and ctDNA was not measured after surgery                                                                    | (21)      |
| Vietsch     | 2018 | Wrong study population: retrospectively selected patients who had disease relapse                                                                              | (22)      |
| Wang        | 2004 | Outcomes not presented in terms of ctDNA after surgery                                                                                                         | (23)      |
| Wang        | 2019 | Outcomes presented in terms of ctDNA status during follow-up rather than post-operatively                                                                      | (24)      |
| Wong        | 2019 | ctDNA analysis in the cohort was not performed routinely post-surgery but at time of concern of disease progression from CT, does not address the issue of MRD | (25)      |
| Yeh         | 2020 | Disease relapse and survival not measured during the follow-up period                                                                                          | (26)      |
| Zhu         | 2021 | Measures cfDNA not ctDNA, no long term follow-up                                                                                                               | (27)      |
| Zhong       | 2020 | Measures cfDNA not ctDNA                                                                                                                                       | (28)      |

**Supplementary Table 2. Key excluded studies.** Table to show the main excluded studies and reason for exclusion from the review. cfDNA- cell free DNA CTC- circulating tumour cells ctDNA- circulating tumour DNA CRC- colorectal cancer MRD- minimal residual disease

| Study ID                         | Median Survival (months) |                    | Hazard ratio | Univariate          |            | Hazard ratio | Multivariate        |         |
|----------------------------------|--------------------------|--------------------|--------------|---------------------|------------|--------------|---------------------|---------|
|                                  | ctDNA positive           | ctDNA negative     |              | Confidence interval | p value    |              | Confidence interval | p value |
| He 2020                          | not reached              | not reached        | not stated   | not stated          | not stated | -            | -                   | -       |
| Ji 2021                          | not reached              | not reached        | not stated   | not stated          | 0.529      | -            | -                   | -       |
| Khakoo 2020                      | not stated               | not stated         | 6.1          | 0.4-97.1            | 0.2        | -            | -                   | -       |
| López-Rojo 2020                  | 22.8                     | 35.4               | -            | -                   | -          | -            | -                   | -       |
| Mason 2021 (>4 mutations)        | [41% at 2 years]         | [96% at 2 years]   | not stated   | not stated          | <0.001     | 6.60         | 2.07-21.06          | 0.001   |
| Murray 2018                      | Not stated               | Not stated         | 6.6          | 1.9-22.8            | 0.011      | -            | -                   | -       |
| Scøhler 2017 (Primary resection) | Not stated               | Not stated         | 6.7          | 1.6-28.7            | 0.01       | -            | -                   | -       |
| Taieb 2021                       | [81% at 5 years]         | [87% at 5 years]   | 1.56         | 1.08-2.26           | 0.018      | 1.65         | 1.12-2.43           | 0.0108  |
| Tie 2021                         | [31.7% at 5 years]       | [77.7% at 5 years] | 4.2          | 1.5-11.8            | <0.001     | -            | -                   | -       |

**Supplementary Table 3. Overall Survival.** Table to show time-to-death following surgery according to post surgery ctDNA status. Confidence intervals displayed as 95%CI. CI- confidence interval. HR- hazard ratio.

| Study ID          | Centre number | Power calculations | Adjustment | Patient population | Co-interventions | Management | ctDNA methodology | Cut-off value | Timeliness consistency | Attrition | Blinding | Relapse definition | Selective reporting | Timeline                   | Attrition (%) | Total |
|-------------------|---------------|--------------------|------------|--------------------|------------------|------------|-------------------|---------------|------------------------|-----------|----------|--------------------|---------------------|----------------------------|---------------|-------|
| Allegretti 2020   | Single        | Nil                | Nil        | High               | High             | Low        | Low               | Low           | Low                    | Low       | Low      | Low                | High                | Prospective                | 16.7          | 8     |
| Beagan 2020       | Single        | Nil                | Nil        | Low                | High             | Low        | Low               | Low           | High                   | Low       | High     | Low                | Low                 | Prospective                | 0             | 7     |
| Benešová 2019     | Multicentre   | Nil                | Nil        | High               | High             | Low        | Low               | Low           | Low                    | Low       | High     | High               | Low                 | Prospective                | 7.1           | 8     |
| Boysen 2020       | Single        | Nil                | Performed  | Low                | Low              | Low        | Low               | Low           | Low                    | Low       | High     | High               | Low                 | Prospective                | 0             | 8     |
| Carpinetti 2015   | Single        | Nil                | Nil        | High               | Low              | Low        | High              | Low           | High                   | Low       | Low      | Low                | Low                 | Prospective                | 0             | 8     |
| Chen 2021         | Multicentre   | Nil                | Performed  | Low                | Low              | Low        | Low               | Low           | Low                    | Low       | Low      | Low                | Low                 | Prospective                | 3.6           | 11    |
| Diehl 2008        | Single        | Nil                | Nil        | Low                | Low              | Low        | Low               | Low           | Low                    | Low       | Low      | Low                | Low                 | Prospective                | 0             | 11    |
| He 2020           | Single        | Nil                | Nil        | Low                | Low              | Low        | Low               | Low           | Low                    | Low       | High     | High               | Low                 | Prospective                | 5             | 9     |
| Huang 2019        | Single        | Nil                | Nil        | Low                | Low              | Low        | Low               | Low           | Low                    | Low       | Low      | High               | Low                 | Prospective                | 4.7           | 11    |
| Ji 2021           | Single        | Nil                | Nil        | Low                | High             | Low        | Low               | Low           | Low                    | High      | High     | High               | High                | Retrospective study design | 30.4          | 6     |
| Jin 2021          | Single        | Nil                | Nil        | Low                | Low              | Low        | Low               | Low           | Low                    | Low       | High     | High               | Low                 | Prospective                | 0             | 9     |
| Khakoo 2020       | Single        | Nil                | Nil        | Low                | Low              | Low        | Low               | Low           | High                   | Low       | High     | High               | High                | Prospective                | 0             | 7     |
| Lee 2021          | Single        | Nil                | Nil        | Low                | High             | Low        | Low               | Low           | Low                    | Low       | Low      | High               | Low                 | Prospective                | 0             | 9     |
| LeonArellano 2020 | Single        | Nil                | Nil        | Low                | High             | Low        | Low               | Low           | Low                    | Low       | Low      | Low                | Low                 | Prospective                | 0             | 10    |
| Levy 2012         | Single        | Nil                | Nil        | Low                | Low              | Low        | Low               | High          | Low                    | Low       | High     | Low                | Low                 | Prospective                | 0             | 9     |
| Lindforss 2005    | Single        | Nil                | Nil        | Low                | High             | Low        | Low               | High          | Low                    | Low       | High     | High               | Low                 | Prospective                | 0             | 7     |
| López-Rojo 2020   | Single        | Nil                | Nil        | Low                | Low              | Low        | Low               | Low           | Low                    | Low       | High     | High               | Low                 | Prospective                | 4             | 9     |
| Mason 2021        | Single        | Nil                | Performed  | Low                | Low              | High       | Low               | Low           | High                   | Low       | High     | Low                | High                | Prospective                | 18.2          | 7     |
| Murahashi 2020    | Single        | Nil                | Performed  | Low                | High             | Low        | Low               | Low           | Low                    | High      | High     | High               | Low                 | Prospective                | 0             | 7     |
| Murray 2018       | Single        | Performed          | Performed  | Low                | High             | Low        | Low               | Low           | High                   | Low       | High     | Low                | Low                 | Prospective                | 23.4          | 8     |
| Ng 2017           | Single        | Nil                | Nil        | Low                | High             | Low        | Low               | Low           | Low                    | Low       | High     | High               | Low                 | Prospective                | 0             | 8     |
| Parikh 2021       | Single        | Nil                | Performed  | Low                | Low              | Low        | Low               | Low           | High                   | Low       | Low      | Low                | Low                 | Prospective                | 16.7          | 10    |

|               |             |           |           |     |      |     |     |     |      |      |      |      |      |                      |            |    |
|---------------|-------------|-----------|-----------|-----|------|-----|-----|-----|------|------|------|------|------|----------------------|------------|----|
| Reinert 2019  | Multicentre | Nil       | Performed | Low | Low  | Low | Low | Low | Low  | Low  | Low  | Low  | Low  | Prospective          | 16.7       | 11 |
| Ryan 2003     | Single      | Nil       | Performed | Low | Low  | Low | Low | Low | Low  | Low  | High | High | Low  | Prospective          | 3.8        | 10 |
| Schøler 2017  | Single      | Nil       | Nil       | Low | Low  | Low | Low | Low | Low  | Low  | High | Low  | High | Retrospective design | Not stated | 8  |
| Suzuki 2020   | Multicentre | Nil       | Nil       | Low | Low  | Low | Low | Low | Low  | Low  | High | High | Low  | Prospective          | 0          | 10 |
| Taieb 2021    | Low         | Nil       | Performed | Low | Low  | Low | Low | Low | Low  | Low  | High | Low  | Low  | Retrospective        | 0          | 9  |
| Tanaka 2021   | Single      | Nil       | Nil       | Low | Low  | Low | Low | Low | Low  | Low  | High | Low  | Low  | Prospective          | 0          | 10 |
| Tarazona 2019 | Single      | Nil       | Performed | Low | Low  | Low | Low | Low | Low  | High | Low  | Low  | Low  | Prospective          | 26.6       | 10 |
| Tie 2016      | Multicentre | Performed | Performed | Low | Low  | Low | Low | Low | High | Low  | Low  | Low  | Low  | Prospective          | 8.7        | 10 |
| Tie 2019 (a)  | Low         | Nil       | Performed | Low | Low  | Low | Low | Low | High | Low  | Low  | Low  | Low  | Prospective          | 0          | 10 |
| Tie 2019 (b)  | Multicentre | Performed | Performed | Low | Low  | Low | Low | Low | High | Low  | Low  | High | Low  | Prospective          | 0          | 9  |
| Tie 2021      | Low         | Performed | Performed | Low | Low  | Low | Low | Low | High | Low  | Low  | High | Low  | Prospective          | 0          | 9  |
| Yamada 2016   | Single      | Nil       | Nil       | Low | Low  | Low | Low | Low | High | Low  | High | High | Low  | Prospective          | 0          | 8  |
| Zhong 2020    | Single      | Nil       | Performed | Low | High | Low | Low | Low | Low  | Low  | High | High | High | Prospective          | 0          | 7  |
| Zhou 2016     | Single      | Nil       | Nil       | Low | Low  | Low | Low | Low | Low  | High | High | Low  | High | Prospective          | 16.7       | 8  |
| Zhou 2021     | Multicentre | Nil       | Nil       | Low | Low  | Low | Low | Low | High | Low  | Low  | High | Low  | Prospective          | 8.2        | 9  |
| Zou 2020      | Single      | Nil       | Nil       | Low | High | Low | Low | Low | Low  | Low  | High | Low  | High | Prospective          | 3.4        | 8  |

**Supplementary Table 4. Quality Assessment.** Overall quality assessment score and breakdown of scores within domains for included studies and percentage of sample lost to attrition.

## Search strategies

### Embase

Database: Embase <1974 to 2021 July 08>

Search Strategy:

- 
- 1 ("circulating tumo?r\*" adj2 DNA).tw. (5593)
  - 2 ("cell-free" adj2 DNA).tw. (10146)
  - 3 ("circulating free" adj2 DNA).tw. (597)
  - 4 (ctDNA or "ct DNA").tw. (7444)
  - 5 (cfDNA or "cf DNA").tw. (5851)
  - 6 (cftDNA or "cft DNA").tw. (41)
  - 7 plasma DNA.tw. (1779)
  - 8 serum DNA.tw. (656)
  - 9 "circulating nucleic acid\*".tw. (668)
  - 10 (KRAS adj2 (mutat\* or gene\*)).tw. (15519)
  - 11 "kirsten rat sarcoma viral oncogene".tw. (620)
  - 12 "v-Ki-ras\*".tw. (338)
  - 13 "Ki-ras".tw. (1407)
  - 14 "K-ras".tw. (9131)
  - 15 (tp53 adj2 (mutat\* or gene\*)).tw. (15739)
  - 16 "micro-satellite instability-high".tw. (2)
  - 17 "microsatellite instability-high".tw. (802)
  - 18 MSI-H.tw. (2778)
  - 19 "liquid biops\*".tw. (7495)
  - 20 circulating tumor DNA/ (5288)
  - 21 microsatellite instability/ (15445)
  - 22 oncogene k ras/ (11316)
  - 23 or/1-22 (83300)
  - 24 (colorectal adj3 (cancer\* or neoplasm\* or malignan\* or carcinoma\* or tumo?r\* or adenocarcinoma\*)).tw. (201238)
  - 25 (colon\* adj3 (cancer\* or neoplasm\* or malignan\* or carcinoma\* or tumo?r\* or adenocarcinoma\*)).tw. (129865)
  - 26 (bowel\* adj3 (cancer\* or neoplasm\* or malignan\* or carcinoma\* or tumo?r\* or adenocarcinoma\*)).tw. (11500)

- 27 (rectal\* adj3 (cancer\* or neoplasm\* or malignan\* or carcinoma\* or tumo?r\* or adenocarcinoma\*)).tw. (50418)
- 28 (rectum adj3 (cancer\* or neoplasm\* or malignan\* or carcinoma\* or tumo?r\* or adenocarcinoma\*)).tw. (7573)
- 29 (sigmoid adj3 (cancer\* or neoplasm\* or malignan\* or carcinoma\* or tumo?r\* or adenocarcinoma\*)).tw. (3575)
- 30 CRC.tw. (59576)
- 31 exp colon cancer/ (291109)
- 32 rectum cancer/ (36860)
- 33 colon tumor/ (21603)
- 34 large intestine tumor/ (197)
- 35 colorectal tumor/ (25343)
- 36 rectum tumor/ (13637)
- 37 or/24-36 (439940)
- 38 colectom\*.tw. (21560)
- 39 proctectom\*.tw. (2347)
- 40 proctocolectom\*.tw. (4695)
- 41 metastectom\*.tw. (232)
- 42 exp abdominal surgery/ (827602)
- 43 exp intestine surgery/ (222175)
- 44 surg\*.ti. (765246)
- 45 postsurg\*.tw. (26667)
- 46 postoperat\*.tw. (758237)
- 47 resect\*.ti. (118531)
- 48 su.fs. (2129556)
- 49 or/38-48 (3290004)
- 50 23 and 37 and 49 (2794)

\*\*\*\*\*

## Medline

Database: Ovid MEDLINE(R) ALL <1946 to July 08, 2021>

Search Strategy:

- 
- 1 ("circulating tumo?r\*" adj2 DNA).tw. (2634)
  - 2 ("cell-free" adj2 DNA).tw. (5594)
  - 3 ("circulating free" adj2 DNA).tw. (282)
  - 4 (ctDNA or "ct DNA").tw. (4031)
  - 5 (cfDNA or "cf DNA").tw. (2532)
  - 6 (cftDNA or "cft DNA").tw. (14)
  - 7 plasma DNA.tw. (1032)
  - 8 serum DNA.tw. (490)
  - 9 "circulating nucleic acid\*".tw. (300)
  - 10 (KRAS adj2 (mutat\* or gene\*)).tw. (7132)
  - 11 "kirsten rat sarcoma viral oncogene".tw. (543)
  - 12 "v-Ki-ras\*".tw. (312)
  - 13 "Ki-ras".tw. (1364)
  - 14 "K-ras".tw. (6327)
  - 15 (tp53 adj2 (mutat\* or gene\*)).tw. (8031)
  - 16 "micro-satellite instability-high".tw. (1)
  - 17 "microsatellite instability-high".tw. (458)
  - 18 MSI-H.tw. (1444)
  - 19 "liquid biops\*".tw. (4157)
  - 20 Circulating Tumor DNA/ (1377)
  - 21 or/1-20 (37572)
  - 22 (colorectal adj3 (cancer\* or neoplasm\* or malignan\* or carcinoma\* or tumo?r\* or adenocarcinoma\*)).tw. (134187)
  - 23 (colon\* adj3 (cancer\* or neoplasm\* or malignan\* or carcinoma\* or tumo?r\* or adenocarcinoma\*)).tw. (93329)
  - 24 (bowel\* adj3 (cancer\* or neoplasm\* or malignan\* or carcinoma\* or tumo?r\* or adenocarcinoma\*)).tw. (7177)
  - 25 (rectal\* adj3 (cancer\* or neoplasm\* or malignan\* or carcinoma\* or tumo?r\* or adenocarcinoma\*)).tw. (32836)
  - 26 (rectum adj3 (cancer\* or neoplasm\* or malignan\* or carcinoma\* or tumo?r\* or adenocarcinoma\*)).tw. (6422)

27 (sigmoid adj3 (cancer\* or neoplasm\* or malignan\* or carcinoma\* or tumo?r\* or  
adenocarcinoma\*)).tw. (2747)

28 CRC.tw. (36057)

29 exp Colorectal Neoplasms/ (211959)

30 or/22-29 (295525)

31 colectom\*.tw. (12740)

32 proctectom\*.tw. (1350)

33 proctocolectom\*.tw. (3136)

34 metastectom\*.tw. (88)

35 Colorectal Surgery/ (3719)

36 exp Digestive System Surgical Procedures/ (383491)

37 surg\*.tw. (2037096)

38 postsurg\*.tw. (20945)

39 postoperat\*.tw. (572414)

40 resect\*.tw. (374680)

41 su.fs. (2072247)

42 or/31-41 (3472737)

43 21 and 30 and 42 (1310)

\*\*\*\*\*

## Cochrane

Search Name: ctDNA and colorectal cancer

Date Run: 09/07/2021 20:01:09

Comment: 090721

| ID  | Search Hits                                                                                                     |
|-----|-----------------------------------------------------------------------------------------------------------------|
| #1  | ((circulating NEXT tumo?r*) NEAR/2 DNA):ti,ab 416                                                               |
| #2  | (cell-free NEAR/2 DNA):ti,ab 226                                                                                |
| #3  | ("circulating free" NEAR/2 DNA):ti,ab 28                                                                        |
| #4  | (ctDNA OR "ct DNA"):ti,ab 454                                                                                   |
| #5  | (cfDNA OR "cf DNA"):ti,ab 164                                                                                   |
| #6  | (cftDNA OR "cft DNA"):ti,ab 2                                                                                   |
| #7  | "plasma DNA":ti,ab 55                                                                                           |
| #8  | "serum DNA":ti,ab 19                                                                                            |
| #9  | ("circulating nucleic" NEAR/2 acid*):ti,ab 5                                                                    |
| #10 | (KRAS NEAR/2 (mutat* OR gene*)):ti,ab 663                                                                       |
| #11 | "kirsten rat sarcoma viral oncogene":ti,ab 40                                                                   |
| #12 | v-Ki-ras*:ti,ab 15                                                                                              |
| #13 | Ki-ras:ti,ab 5                                                                                                  |
| #14 | K-ras:ti,ab 231                                                                                                 |
| #15 | (tp53 NEAR/2 (mutat* OR gene*)):ti,ab 412                                                                       |
| #16 | "micro-satellite instability-high":ti,ab 0                                                                      |
| #17 | "microsatellite instability-high":ti,ab 55                                                                      |
| #18 | MSI-H:ti,ab 99                                                                                                  |
| #19 | ("liquid" NEAR/2 biops*):ti,ab 128                                                                              |
| #20 | [mh ^"Circulating Tumor DNA"] 16                                                                                |
| #21 | {OR #1-#20} 2251                                                                                                |
| #22 | (colorectal NEAR/3 (cancer* OR neoplasm* OR malignan* OR carcinoma* OR tumo?r* OR adenocarcinoma*)):ti,ab 14177 |
| #23 | (colon* NEAR/3 (cancer* OR neoplasm* OR malignan* OR carcinoma* OR tumo?r* OR adenocarcinoma*)):ti,ab 4584      |
| #24 | (bowel* NEAR/3 (cancer* OR neoplasm* OR malignan* OR carcinoma* OR tumo?r* OR adenocarcinoma*)):ti,ab 629       |
| #25 | (rectal* NEAR/3 (cancer* OR neoplasm* OR malignan* OR carcinoma* OR tumo?r* OR adenocarcinoma*)):ti,ab 3737     |

#26 (rectum NEAR/3 (cancer\* OR neoplasm\* OR malignan\* OR carcinoma\* OR tumo?r\* OR adenocarcinoma\*)):ti,ab 587

#27 (sigmoid NEAR/3 (cancer\* OR neoplasm\* OR malignan\* OR carcinoma\* OR tumo?r\* OR adenocarcinoma\*)):ti,ab 89

#28 CRC:ti,ab 4461

#29 [mh "Colorectal Neoplasms"] 8554

#30 {OR #22-#29} 22347

#31 colectom\*:ti,ab 1097

#32 proctectom\*:ti,ab 74

#33 proctocolectom\*:ti,ab 138

#34 metastectom\*:ti,ab 9

#35 [mh ^"Colorectal Surgery"] 202

#36 [mh "Digestive System Surgical Procedures"] 14341

#37 surg\*:ti,ab 212530

#38 postsurg\*:ti,ab 6549

#39 postoperat\*:ti,ab 112538

#40 resect\*:ti,ab 26960

#41 MeSH descriptor: [] explode all trees and with qualifier(s): [surgery - SU] 59936

#42 {OR #31-#41} 276555

#43 #21 AND #30 AND #42 196

## Quality Assessment form

---

### 1. Single or multicentre study

Number of centres patients were recruited from

*Single- high risk mulit centre- low risk*

---

### 2. Patient population

Are the patient population clearly described adequate baseline clinical data collected on cohort

*high-no Low-yes*

---

### 3. Sample size and power calculations

Number of patients recruited, sample size calculations

*Low- sample size calculations performed High- not performed*

---

### 4. Are any co intervention clearly and unambiguously stated

Did patients receive adjuvant chemotherapy following resection, if so was this accounted for and were outcomes presented separately in terms of this.

Did all patients receiving adjuvant chemotherapy receive the same therapy (regimes, duration)

Were the surgical resections performed equivalent between the two groups, were lymph node involvement outcomes comparable, did all patients in the cohort achieve R0 resections

*High- no, Low- yes*

---

### 5. Were different management strategies initiated based on ctDNA results

Were ctDNA levels used to guide treatment decisions

*High- yes Low- no*

---

### 6. ctDNA methodology

was the ctDNA methodology was adequately described

*Low- adequately described. High- not well described*

---

### 7. Cut-off value

Description of cut off for consideration of ctDNA positive/detectable, was this defined beforehand ctDNA status defined prospectively at the time of measurement and not retrospectively after the follow up period

*low- clearly defined high- ambiguous*

---

### 8. Time line consistency

Were there time line consistencies for all ctDNA measurements, how wide was the timing interval over which measurements could be taken

*low- set timeframe stated in methods samples collected from sample at same time following surgery, high- wide range*

---

### 9. Attrition

Are attrition rates adequately described

*high- well described low - poorly described*

---

### 10. Adjustment

Was multi variate analysis performed, were outcomes presented adjusted for cofounding variables

*high- no low- yes*

---

### 11. Blinding

Were the treating physicians blinded to the ctDNA results when making treatment decisions (ie decisions regarding adjuvant chemotherapy), were assessors blinded to the ctDNA result (positive/negative) when collecting follow up data (OS, PFS)

*high- no blinding, low- blinded*

---

### 12. Clear definition of recurrence

Definition of recurrence- was it confirmed radiologically, was the time at radiological confirmation of recurrence used in calculating PFS.

*high- not clearly defined, low- clearly defined, radiologically*

---

### 13. Selective reporting of results

Outcomes for all groups clearly presented

*yes- low, no-high*

---

## Data Extraction form

|                                                                                                                                                                                                                                                           |
|-----------------------------------------------------------------------------------------------------------------------------------------------------------------------------------------------------------------------------------------------------------|
| <b>1. Study Details</b>                                                                                                                                                                                                                                   |
| Study ID                                                                                                                                                                                                                                                  |
| Covidence ID                                                                                                                                                                                                                                              |
| Title                                                                                                                                                                                                                                                     |
| Author                                                                                                                                                                                                                                                    |
| <i>Surname of first author et al</i>                                                                                                                                                                                                                      |
| Journal published in                                                                                                                                                                                                                                      |
| Year of publication                                                                                                                                                                                                                                       |
| Country                                                                                                                                                                                                                                                   |
| <i>Country in which patients were treated</i>                                                                                                                                                                                                             |
| Journal                                                                                                                                                                                                                                                   |
| Trial ID number or local ethics number                                                                                                                                                                                                                    |
| Study centre number                                                                                                                                                                                                                                       |
| <i>Number of centres data collection took place in</i>                                                                                                                                                                                                    |
| Additional notes                                                                                                                                                                                                                                          |
| <b>2. Study Design</b>                                                                                                                                                                                                                                    |
| Sample size                                                                                                                                                                                                                                               |
| <i>Total number of patient who completed the study (addressing our study objective), Not including healthy controls or other study groups in the study addressing other research questions</i>                                                            |
| Attrition                                                                                                                                                                                                                                                 |
| <i>Total attrition number and attrition according to group (ctDNA positive vs negative). Attrition defined as withdrawal from study due to unexpected natural causes not part of disease process or outcomes, eg. lost to follow up, withdrew consent</i> |
| Number of patients completed all follow-up                                                                                                                                                                                                                |
| Follow up duration                                                                                                                                                                                                                                        |
| <i>Median follow up, in months</i>                                                                                                                                                                                                                        |
| Follow up - range                                                                                                                                                                                                                                         |
| <i>Follow up range in months</i>                                                                                                                                                                                                                          |
| Study timeline                                                                                                                                                                                                                                            |
| <input type="checkbox"/> Prospective                                                                                                                                                                                                                      |
| <input type="checkbox"/> Retrospective                                                                                                                                                                                                                    |
| <input type="checkbox"/> Other                                                                                                                                                                                                                            |
| Study aims: Primary and secondary study objectives                                                                                                                                                                                                        |
| Inclusion criteria                                                                                                                                                                                                                                        |
| Exclusion criteria                                                                                                                                                                                                                                        |
| Post operative monitoring                                                                                                                                                                                                                                 |
| <i>Method, frequency and duration of post op monitoring after surgery</i>                                                                                                                                                                                 |
| Additional notes                                                                                                                                                                                                                                          |
| <b>3. Patient characteristics</b>                                                                                                                                                                                                                         |
| Age                                                                                                                                                                                                                                                       |
| <i>Median age of participant in years to the nearest year</i>                                                                                                                                                                                             |
| <input type="checkbox"/> Age statistic                                                                                                                                                                                                                    |
| <input type="checkbox"/> Median                                                                                                                                                                                                                           |
| <input type="checkbox"/> Mean                                                                                                                                                                                                                             |
| <input type="checkbox"/> Mode                                                                                                                                                                                                                             |
| <input type="checkbox"/> Not stated                                                                                                                                                                                                                       |
| <input type="checkbox"/> Other                                                                                                                                                                                                                            |
| Gender                                                                                                                                                                                                                                                    |
| <i>%male to one decimal place</i>                                                                                                                                                                                                                         |
| Histology                                                                                                                                                                                                                                                 |
| Histology of cancer primary                                                                                                                                                                                                                               |
| <input type="checkbox"/> Adenocarcinoma                                                                                                                                                                                                                   |

|                                                                                                                                                                                                        |
|--------------------------------------------------------------------------------------------------------------------------------------------------------------------------------------------------------|
| <input type="checkbox"/> GIST<br><input type="checkbox"/> NET<br><input type="checkbox"/> Not stated<br><input type="checkbox"/> Other                                                                 |
| Cancer stage                                                                                                                                                                                           |
| Cancer site<br><input type="checkbox"/> Colon<br><input type="checkbox"/> Rectal<br><input type="checkbox"/> Colon and rectal<br><input type="checkbox"/> Metastases<br><input type="checkbox"/> Other |
| Site- percentage colon<br><i>Percentage of cases where the primary site was colon (vs. rectal)</i>                                                                                                     |
| Cancer side<br><i>percentage right sided colon cancer to one decimal place. If not mentioned or not applicable 'not stated'</i>                                                                        |
| Additional notes                                                                                                                                                                                       |
| Chemotherapy                                                                                                                                                                                           |
| Neoadjuvant chemotherapy<br><i>Proportion of patients in cohort who had chemotherapy prior to surgery (% to one decimal place)</i>                                                                     |
| Neoadjuvant chemotherapy regimes                                                                                                                                                                       |
| Adjuvant chemotherapy: percentage of patients<br><i>Proportion of patients in cohort who had chemotherapy prior to surgery (% to one decimal place)</i>                                                |
| Adjuvant chemotherapy regime                                                                                                                                                                           |
| Adjuvant chemotherapy duration                                                                                                                                                                         |
| Number of cycles                                                                                                                                                                                       |
| <b>4. ctDNA measurement</b>                                                                                                                                                                            |
| Pre surgery levels<br><i>Was a liquid biopsy performed prior to surgery</i><br><input type="checkbox"/> Yes<br><input type="checkbox"/> No                                                             |
| Timing of pre surgery levels                                                                                                                                                                           |
| Number of liquid biopsy post-surgery                                                                                                                                                                   |
| Time range over which all liquid biopsies were performed<br><i>Time from surgery to timing of last liquid biopsy performed</i>                                                                         |
| Timing of first measurement post-surgery<br><i>Time in months after surgery the first liquid biopsy was performed after surgery</i>                                                                    |
| Sample type<br><input type="checkbox"/> Plasma<br><input type="checkbox"/> Serum<br><input type="checkbox"/> Not stated<br><input type="checkbox"/> Other                                              |
| Method of detection                                                                                                                                                                                    |
| Gene panel/ target genes                                                                                                                                                                               |
| Limit of detection                                                                                                                                                                                     |
| Cut off level<br><i>Cut of level for which measurements were considered 'ctDNA positive', if any above limit of detection</i>                                                                          |
| Additional notes                                                                                                                                                                                       |
| <b>5. Outcomes</b>                                                                                                                                                                                     |
| Percentage with detectable ctDNA<br><i>Proportion of cohort who were considered ctDNA positive at first liquid biopsy after surgery (% to one decimal place)</i>                                       |

|                                                                                                                                                                                                                                                                                                                                |
|--------------------------------------------------------------------------------------------------------------------------------------------------------------------------------------------------------------------------------------------------------------------------------------------------------------------------------|
| Percentage with detectable ctDNA post-operatively who experienced disease recurrence during the follow-up period                                                                                                                                                                                                               |
| <i>Recurrence defined as radiological recurrence during the follow up period, if more than one liquid biopsy was performed post surgery, patients should be stratified according to the first ctDNA measurement taken after curative surgery or after completion of adjuvant chemotherapy, Percentage to one decimal place</i> |
| Percentage with undetectable ctDNA post operatively who experienced disease recurrence during the follow-up period                                                                                                                                                                                                             |
| <i>Recurrence defined as radiological recurrence during the follow up period, if more than one liquid biopsy was performed post surgery, patients should be stratified according to the first ctDNA measurement taken after curative surgery or after completion of adjuvant chemotherapy, percentage to one decimal place</i> |
| Mutations detected                                                                                                                                                                                                                                                                                                             |
| <i>Main genes in which mutations were seen</i>                                                                                                                                                                                                                                                                                 |
| Percentage with mutations detected                                                                                                                                                                                                                                                                                             |
| <i>Percentage of patients in whom mutations were detected on ctDNA analysis</i>                                                                                                                                                                                                                                                |
| Study conclusions                                                                                                                                                                                                                                                                                                              |
| Multivariate analysis                                                                                                                                                                                                                                                                                                          |
| <i>Were any adjustments for cofounding variables carried out, which variables were adjusted for</i>                                                                                                                                                                                                                            |
| Outcomes                                                                                                                                                                                                                                                                                                                       |
| Median PFS ctDNA positive                                                                                                                                                                                                                                                                                                      |
| <i>Median PFS of ctDNA positive patients in months, to nearest month, for all patients</i>                                                                                                                                                                                                                                     |
| Median PFS ctDNA negative                                                                                                                                                                                                                                                                                                      |
| <i>Median PFS of ctDNA negative patients in months, to nearest month, for all patients in the cohort</i>                                                                                                                                                                                                                       |
| Hazard ratio                                                                                                                                                                                                                                                                                                                   |
| <i>Hazard ratio of PFS for ctDNA positive compared to negative for all patients in the cohort, with 95% confidence intervals and p value.</i>                                                                                                                                                                                  |
| Median PFS ctDNA positive (adjuvant chemotherapy)                                                                                                                                                                                                                                                                              |
| <i>Median PFS of ctDNA positive patients in months, to nearest month, for patients who received adjuvant chemotherapy</i>                                                                                                                                                                                                      |
| Median PFS ctDNA negative (adjuvant chemotherapy)                                                                                                                                                                                                                                                                              |
| <i>Median PFS of ctDNA negative patients in months, to nearest month, for patients who received adjuvant chemotherapy</i>                                                                                                                                                                                                      |
| Hazard ratio (adjuvant chemotherapy)                                                                                                                                                                                                                                                                                           |
| <i>Hazard ratio of PFS for ctDNA positive compared to negative for patients who received adjuvant chemotherapy, with 95% confidence intervals and p value</i>                                                                                                                                                                  |
| Median PFS ctDNA positive (no adjuvant chemotherapy)                                                                                                                                                                                                                                                                           |
| <i>Median PFS of ctDNA positive patients in months, to nearest month, for patients who did not receive adjuvant chemotherapy</i>                                                                                                                                                                                               |
| Median PFS ctDNA negative (no adjuvant chemotherapy)                                                                                                                                                                                                                                                                           |
| <i>Median PFS of ctDNA negative patients in months, to nearest month, for patients who did not receive adjuvant chemotherapy</i>                                                                                                                                                                                               |
| Hazard ratio (no adjuvant chemotherapy)                                                                                                                                                                                                                                                                                        |
| <i>Hazard ratio of PFS for ctDNA positive compared to negative for patients who did not receive adjuvant chemotherapy, with 95% confidence intervals and p value</i>                                                                                                                                                           |
| Overall survival                                                                                                                                                                                                                                                                                                               |
| Median survival ctDNA positive                                                                                                                                                                                                                                                                                                 |
| <i>In months</i>                                                                                                                                                                                                                                                                                                               |
| Median survival ctDNA negative                                                                                                                                                                                                                                                                                                 |
| <i>In months</i>                                                                                                                                                                                                                                                                                                               |
| Hazard ratio                                                                                                                                                                                                                                                                                                                   |
| <i>Hazard ratio of OS for ctDNA positive compared to negative patient, with 95% confidence intervals and p value</i>                                                                                                                                                                                                           |

## References

1. Appelt AL, Andersen RF, Lindebjerg J, Jakobsen A. Prognostic Value of Serum NPY Hypermethylation in Neoadjuvant Chemoradiotherapy for Rectal Cancer. *Am J Clin Oncol* [Internet]. 2020;43(1):9–13.
2. Baumgartner JM, Raymond VM, Lanman RB, Tran L, Kelly KJ, Lowy AM, et al. Preoperative Circulating Tumor DNA in Patients with Peritoneal Carcinomatosis is an Independent Predictor of Progression-Free Survival. *Ann Surg Oncol* [Internet]. 2018 ;25(8):2400–8.
3. Bazan V, Bruno L, Augello C, Agnese V, Calo V, Corsale S, et al. Molecular detection of TP53, Ki-Ras and p16INK4A promoter methylation in plasma of patients with colorectal cancer and its association with prognosis. Results of a 3-year GOIM (Gruppo Oncologico dell'Italia Meridionale) prospective study. *Ann Oncol Off J Eur Soc Med Oncol* [Internet]. 2006 ;17 Suppl 7:vii84-90.
4. Bidard F-C, Kiavue N, Ychou M, Cabel L, Stern M-H, Madic J, et al. Circulating Tumor Cells and Circulating Tumor DNA Detection in Potentially Resectable Metastatic Colorectal Cancer: A Prospective Ancillary Study to the Unicancer Prodige-14 Trial. *Cells*. 2019;8(6).
5. Cassinotti E, Boni L, Segato S, Rausei S, Marzorati A, Rovera F, et al. Free circulating DNA as a biomarker of colorectal cancer. *Int J Surg*. 2013;11 Suppl 1:S54-7.
6. Frattini M, Gallino G, Signoroni S, Balestra D, Battaglia L, Sozzi G, et al. Quantitative analysis of plasma DNA in colorectal cancer patients: a novel prognostic tool. *Ann N Y Acad Sci*. 2006 ;1075:185–90.
7. Frattini M, Gallino G, Signoroni S, Balestra D, Lusa L, Battaglia L, et al. Quantitative and qualitative characterization of plasma DNA identifies primary and recurrent colorectal cancer. *Cancer Lett*. 2008;263(2):170–81.
8. García-Olmo D, García-Olmo DC, Domínguez-Berzosa C, Guadalajara H, Vega L, García-Arranz M. Oncogenic transformation induced by cell-free nucleic acids circulating in plasma (genometastasis) remains after the surgical resection of the primary tumor: A pilot study. *Expert Opin Biol Ther*. 2012 ;12(SUPPL. 1).
9. Hao TB, Shi W, Shen XJ, Qi J, Wu XH, Wu Y, et al. Circulating cell-free DNA in serum as a biomarker for diagnosis and prognostic prediction of colorectal cancer. *Br J Cancer* [Internet]. 2014;111(8):1482–9.
10. Hendricks A, Eggebrecht G-L, Bernsmeier A, Geisen R, Dall K, Trauzold A, et al. Identifying patients with an unfavorable prognosis in early stages of colorectal carcinoma. *Oncotarget*. 2018 8a;9(44):27423–34.
11. Herbst A, Wallner M, Rahmig K, Stieber P, Crispin A, Lamerz R, et al. Methylation of helicase-like transcription factor in serum of patients with colorectal cancer is an independent predictor of disease recurrence. *Eur J Gastroenterol Hepatol*. 2009;21(5):565–9.
12. Hsieh J-S, Lin S-R, Chang M-Y, Chen F-M, Lu C-Y, Huang T-J, et al. APC, K-ras, and p53 gene mutations in colorectal cancer patients: correlation to clinicopathologic features and postoperative surveillance. *Am Surg*. 2005;71(4):336–43.
13. Iwai T, Yamada T, Takahashi G, Takeda K, Koizumi M, Shinji S, et al. Circulating cell-free long DNA fragments predict post-hepatectomy recurrence of colorectal liver metastases. *Eur J Surg Oncol*. 2019;46(1):108–14.

14. Li J, Jiang W, Wei J, Zhang J, Cai L, Luo M, et al. Patient specific circulating tumor DNA fingerprints to monitor treatment response across multiple tumors. *J Transl Med.* 2020;18(1):293.
15. Lin J-K, Lin P-C, Lin C-H, Jiang J-K, Yang S-H, Liang W-Y, et al. Clinical relevance of alterations in quantity and quality of plasma DNA in colorectal cancer patients: based on the mutation spectra detected in primary tumors. *Ann Surg Oncol.* 2014;21 Suppl 4:S680-6.
16. Narayan RR, Goldman DA, Gonen M, Reichel J, Huberman KH, Raj S, et al. Peripheral Circulating Tumor DNA Detection Predicts Poor Outcomes After Liver Resection for Metastatic Colorectal Cancer. *Ann Surg Oncol.* 2019;26(6):1824–32.
17. Pazdirek F, Minarik M, Benesova L, Halkova T, Belsanova B, Macek M, et al. Monitoring of Early Changes of Circulating Tumor DNA in the Plasma of Rectal Cancer Patients Receiving Neoadjuvant Concomitant Chemoradiotherapy: Evaluation for Prognosis and Prediction of Therapeutic Response. *Front Oncol.* 2020;10:1028.
18. Polivka J, Windrichova J, Pesta M, Houfkova K, Rezackova H, Macanova T, et al. The Level of Preoperative Plasma KRAS Mutations and CEA Predict Survival of Patients Undergoing Surgery for Colorectal Cancer Liver Metastases. *Cancers (Basel).* 2020;12(9).
19. Schou J V., Larsen FO, Sørensen BS, Abrantes R, Boysen AK, Johansen JS, et al. Circulating cell-free DNA as predictor of treatment failure after neoadjuvant chemoradiotherapy before surgery in patients with locally advanced rectal cancer. *Ann Oncol.* 2018;29(3):610–5.
20. Symonds EL, Pedersen SK, Murray DH, Jedi M, Byrne SE, Rabbitt P, et al. Circulating tumour DNA for monitoring colorectal cancer-a prospective cohort study to assess relationship to tissue methylation, cancer characteristics and surgical resection. *Clin Epigenetics.* 2018;10:63.
21. Vidal J, Casadevall D, Bellosillo B, Pericay C, Garcia-Carbonero R, Losa F, et al. Clinical Impact of Presurgery Circulating Tumor DNA after Total Neoadjuvant Treatment in Locally Advanced Rectal Cancer: A Biomarker Study from the GEMCAD 1402 Trial. *Clin Cancer Res.* 2021;27(10):2890–8.
22. Vietsch EE, Graham GT, McCutcheon JN, Javaid A, Giaccone G, Marshall JL, et al. Reprint of: Circulating cell-free DNA mutation patterns in early and late stage colon and pancreatic cancer. *Cancer Genet.* 2018;228–229:131–42.
23. Wang J-Y, Hsieh J-S, Chang M-Y, Huang T-J, Chen F-M, Cheng T-L, et al. Molecular detection of APC, K- ras, and p53 mutations in the serum of colorectal cancer patients as circulating biomarkers. *World J Surg.* 2004;28(7):721–6.
24. Wang Y, Li L, Cohen JD, Kinde I, Ptak J, Popoli M, et al. Prognostic Potential of Circulating Tumor DNA Measurement in Postoperative Surveillance of Nonmetastatic Colorectal Cancer. *JAMA Oncol.* 2019;5(8):1118–23.
25. Wong R, Tie J, Lee M, Cohen J, Wang Y, Li L, et al. The potential role of circulating tumor DNA (ctDNA) in the further investigation of colorectal cancer patients with nonspecific findings on standard investigations. *Int J Cancer.* 2019;145(2):540–7.
26. Yeh Y-M, Lin P-C, Lee C-T, Chen S-H, Lin B-W, Lin S-C, et al. Treatment monitoring of colorectal cancer by integrated analysis of plasma concentration and sequencing of circulating tumor DNA. *Mol Cancer.* 2020;19(1):150.
27. Zhu F, Ma J, Ru D, Wu N, Zhang Y, Li H, et al. Plasma DNA Integrity as a Prognostic

Biomarker for Colorectal Cancer Chemotherapy. J Oncol. 2021;2021:5569783.

28. Zhong Y, Zhou Q, Zhang Y, Zhou S, Zhang G, Jiang C, et al. Cell-free DNA as a biomarker for colorectal cancer: a retrospective analysis in patients before and after surgery. Cell Mol Biol (Noisy-le-grand). 2020;66(2):135–41.
